# Supplementary material for: Fast microflow kinetics and acid catalyst deactivation in glucose conversion to 5-hydroxymethylfurfural
Source: Royal Society of Chemistry journal article supplement (doi:10.1039/d0re00391c), 2020-11-02
Supplement: d0re00391c1.pdf [file d0re00391c1.pdf]

Supporting Information

## Fast Microflow Kinetics and Acid Catalyst Deactivation in Glucose Conversion to 5-hydroxymethylfurfural

Tai-Ying Chen<sup>a</sup>, Ziwei Cheng<sup>a</sup>, Pierre Desir<sup>a</sup>, Basudeb Saha<sup>b,c</sup>, and Dionisios G. Vlachos<sup>a,b,\*</sup>

<sup>a</sup>Department of Chemical and Biomolecular Engineering, University of Delaware, 150 Academy Street, Newark, Delaware 19716, United States

<sup>b</sup>Catalysis Center for Energy Innovation, 221 Academy Street, Newark, Delaware 19716, United States

<sup>c</sup>Current affiliation: RiKarbon Inc, 550 S. College Ave, Newark, Delaware 19716, United States

\*Corresponding author; [vlachos@udel.edu](mailto:vlachos@udel.edu) (D.G. Vlachos)

### Configuration of the flow microreactor

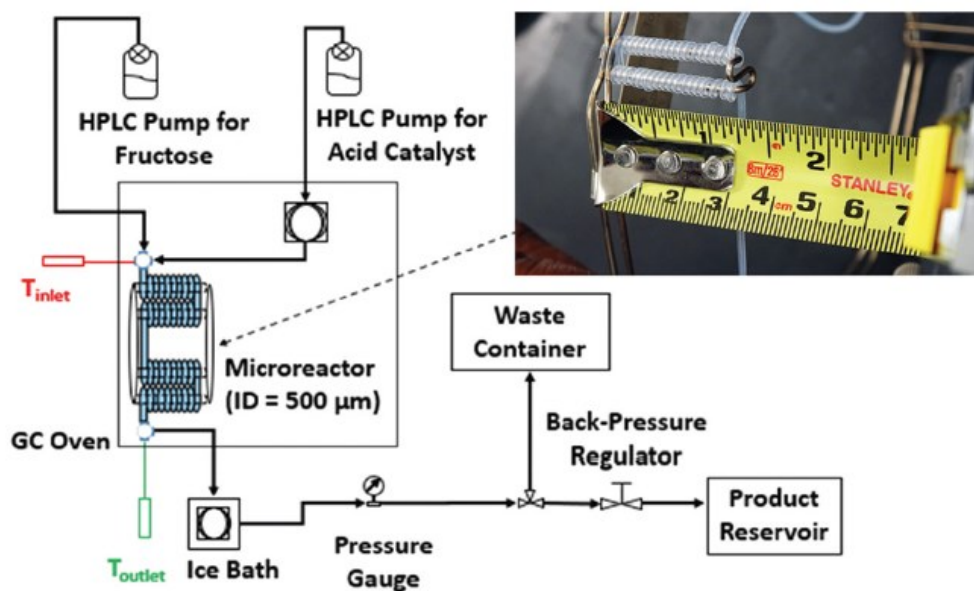

Scheme S1. Schematic overview of the microchannel flow reactor setup. Reprinted with permission from Desir et al.<sup>1</sup> Copyright (2019) Royal society of chemistry.

## Proposed reaction network for catalyst speciation model

The proposed reaction network for the catalyst speciation model is shown in Scheme S2. The rate constant of the reverse reactions of R<sub>2</sub> and R<sub>3</sub> are modeled from the equilibrium constant and the forward rate constants. The equilibrium constants of R<sub>2</sub> and R<sub>3</sub> used in this study, obtained from OLI software, are shown in Table S1. The reaction orders are assumed equal to the stoichiometric coefficients for each reactant. The model equation is given by Eqs. (S1), where  $C_i$  is the concentration of component  $i$ ;  $R_j$  is the reaction rate of reaction  $j$ ,  $R'_j$  is the reaction rate of reverse reaction  $j$ ; and  $\alpha_{ij}$  is the stoichiometric coefficient of component  $i$  in reaction  $j$ .

$$\frac{dC_i}{dt} = \sum_j \alpha_{ij}(R_j + R'_j) \quad (S1)$$

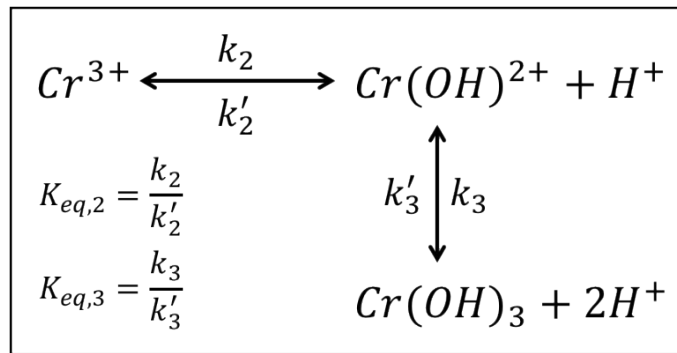

Scheme S2. Proposed reaction network for the catalyst speciation model.

Table S1. Equilibrium constant of R<sub>2</sub> and R<sub>3</sub> used in this study.

| Temperature [°C] | $K_{eq,2}$ [M] | $K_{eq,3}$ [M] |
|------------------|----------------|----------------|
| 140              | 0.0081         | 0.082          |
| 160              | 0.015          | 0.23           |
| 180              | 0.026          | 0.59           |

## Method for calculating the initial glucose reaction rate

The reaction rate of glucose follows first-order kinetics and has the following rate expression as Eq. (S2),

$$r_{glu} = - \frac{dC_{glu}}{dt} \quad (S2)$$

where  $r_{glu}$  denotes the rate, and  $C_{glu}$  is the glucose concentration at any time. At conversions less than 15%, one can assume that the rate is the initial rate at the inlet of the inlet conditions. Therefore, a linear fit of the glucose concentration vs. time data at <15% conversion is used to obtain the initial glucose reaction rate. A sample calculation is provided in Figure S1.

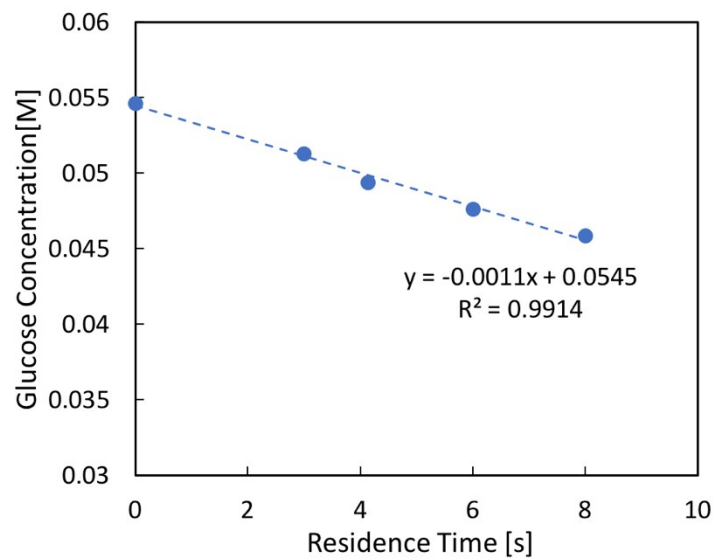

Figure S1. Glucose concentration ( $C_{\text{glu}}$ ) vs. time ( $t$ ) at 180 °C using a 1.7 mM  $\text{CrCl}_3$  catalyst which was preheated for 1 mins. A linear fit (dashed line) was used to obtain the initial glucose reaction rate of  $11 \times 10^{-4}$  M/s.

## References

1. P. Desir, B. Saha and D. G. Vlachos, *Energy & Environmental Science*, 2019, **12**, 2463-2475.
